# Supplementary material
Source: publisher figshare collection journal article supplement (https://gsajournals.figshare.com/ndownloader/files/18059189)
Supplement: Supplementary file 1 [file 18059189]

**Figure S5. Phylogeny of Toll-like receptor (TLR) protein family**
